# Supplementary material for: Functional Role of Histidine in the Conserved His-x-Asp Motif in the Catalytic Core of Protein Kinases
Source: PubMed Central journal article supplement (PMC4650784; doi:10.1038/srep10115), 2015-05-11
Supplement: srep10115-s1.pdf [file srep10115-s1.pdf]

## Supplementary Information:

### Functional Role of histidine in the conserved His-x-Asp motif in the Catalytic Core of Protein Kinases

Lun Zhang<sup>1</sup>, Jian-Chuan Wang<sup>2</sup>, Li Hou<sup>1</sup>, Peng-Rong Cao<sup>1</sup>, Li Wu<sup>3</sup>, Qian-Sen Zhang<sup>4</sup>, Huai-Yu Yang<sup>4</sup>, Yi Zang<sup>1,\*</sup>, Jian-Ping Ding<sup>2,\*</sup> and Jia Li<sup>1,3,\*</sup>

<sup>1</sup>National Center for Drug Screening and State Key Laboratory of Drug Research, Shanghai Institute of *Materia Medica*, Chinese Academy of Sciences, 189 Guo Shoujing Road, Shanghai 201203, China

<sup>2</sup>State Key Laboratory of Molecular Biology, Institute of Biochemistry and Cell Biology, Shanghai Institutes for Biological Sciences, Chinese Academy of Sciences, 320 Yueyang Road, Shanghai 200031, China

<sup>3</sup>School of Life Sciences, East China Normal University, 3663 North Zhongshan Road, Shanghai 200062, China

<sup>4</sup>Drug Discovery and Design Center, State Key Laboratory of Drug Research and Chinese Academy of Sciences Key Laboratory of Receptor Research, Shanghai Institute of *Materia Medica*, Chinese Academy of Sciences, 555 Zu Chongzhi Road, Shanghai 201203, China

\*To whom correspondence should be addressed: Jia Li, 189 Guo Shoujing Road, Shanghai 201203, China, Tel: 86-21-50801552, E-mail: [jli@simmm.ac.cn](mailto:jli@simmm.ac.cn); or Jianping Ding, 320 Yueyang Road, Shanghai 200031, China, Tel: 86-21-54921619, E-mail: [jpding@sibcb.ac.cn](mailto:jpding@sibcb.ac.cn); or Yi Zang, 189 Guo Shoujing Road, Shanghai 201203, China, Tel: 86-21-50801552, E-mail: [yzang@simmm.ac.cn](mailto:yzang@simmm.ac.cn);

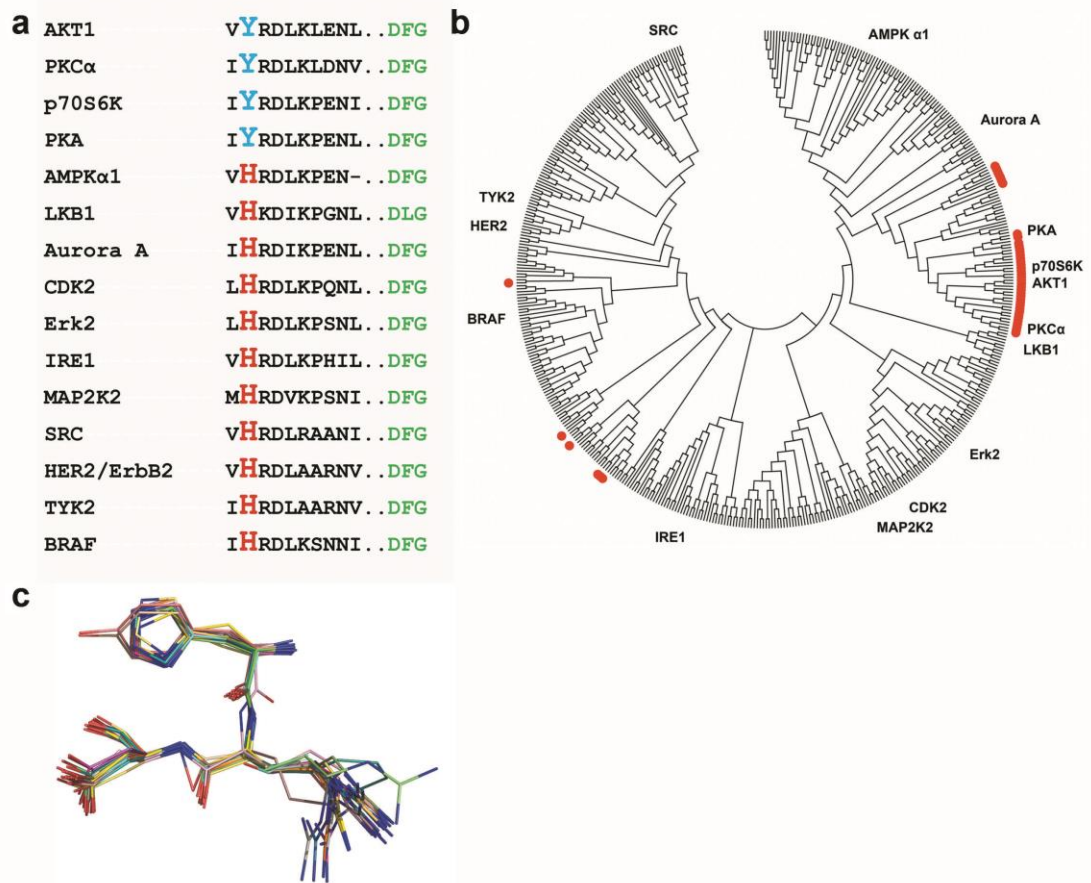

**Fig. S1** HxD-histidine is highly conserved in protein kinases. HxD-histidine is conserved through different members of human kinome (*a-b*). HxD histidine is replaced by tyrosine mainly in partial members of AGC kinase family (*b*). In spite of the differences in sequences, the conformation of HxD/YxD motif is conserved in activated kinases conformation (*c*). Kinases aligned in (*a*) are all labeled in (*b*). 45 YxD-kinases are labeled by red dots in (*b*). Conformations aligned in (*c*) have been listed in Table S1.

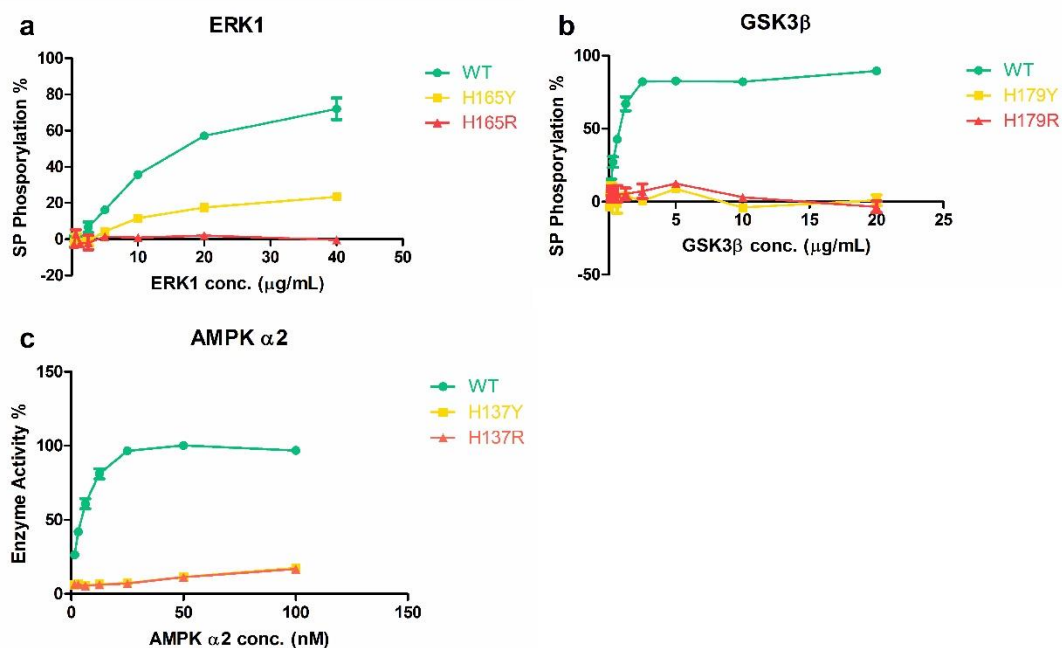

**Fig. S2** Kinase activities of EPKs are impaired by the HxD-histidine mutations. (a-b) Assays were carried out using Z-lyte™ Assay Kit from Invitrogen. Fluorescence of the reaction mixtures containing 1 $\mu\text{M}$  substrate peptide (SP) and 20 $\mu\text{M}$  ATP as well as variant concentrations of the mixtures of ERK1 and MAK (at molar ratio of 1:5), or the reactions containing variant concentrations of GSK3 $\beta$  as well as 1 $\mu\text{M}$  substrate peptide (SP) and 30 $\mu\text{M}$  ATP, were read after the mixtures were incubated for 1 hour at 30 $^{\circ}\text{C}$ . (c) Assays were carried out with htrf™ Assay Kit from cis-bio. 200 nM AMPK $\alpha$ 2 subunit (1-285) or its mutant were pre-phosphorylated in reaction buffer containing 80nM LKB1, 20 mM Tris-HCl pH=8.0, 5 mM MgCl<sub>2</sub>, 1 mM DTT and 200  $\mu\text{M}$  ATP for 2 hours at 30 $^{\circ}\text{C}$ . Fluorescence of the reaction mixtures containing variant concentrations of pre-phosphorylated enzymes as well as 200 $\mu\text{M}$  ATP and substrate peptide were read after the mixtures were incubated at 30 $^{\circ}\text{C}$  for 15min.

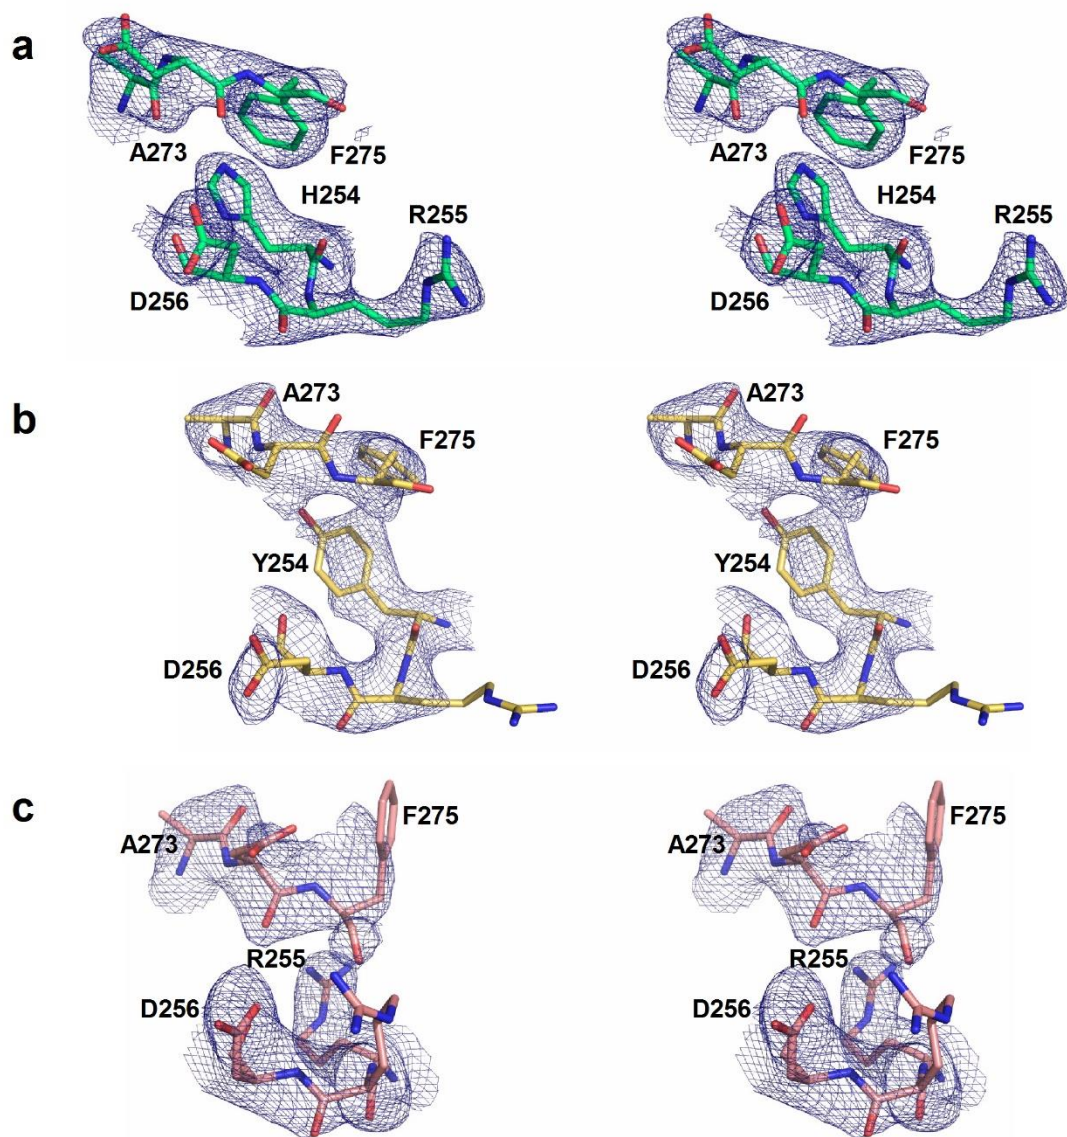

**Fig. S3** 2mFo-Fc electron density maps of the key residues of the WT (*a*), H254Y (*b*), and H254R (*c*) Aurora A proteins. Contour level of the 2Fo-Fc maps is 1.0. The carbons of the WT, H254Y and H254R Aurora A proteins are colored green, yellow and pink, respectively.

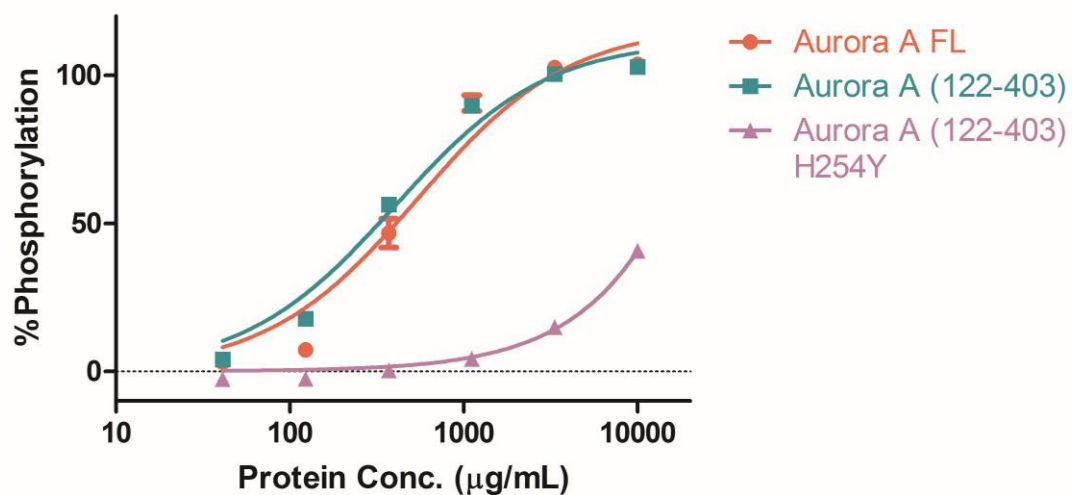

**Fig. S4** Kinase activity of Aurora A is not affected by the truncation. Assay was carried out using Z-lyte™ Assay Kit from Invitrogen. 200 nM enzymes were separately incubated in reaction buffer containing 20 mM Tris-HCl pH=8.0, 5 mM MgCl<sub>2</sub>, 1 mM DTT and 200 µM ATP for 1 hour at 30°C. Variant concentrations of enzymes were mixed with substrate peptide and incubated for 1 hour at 30°C.

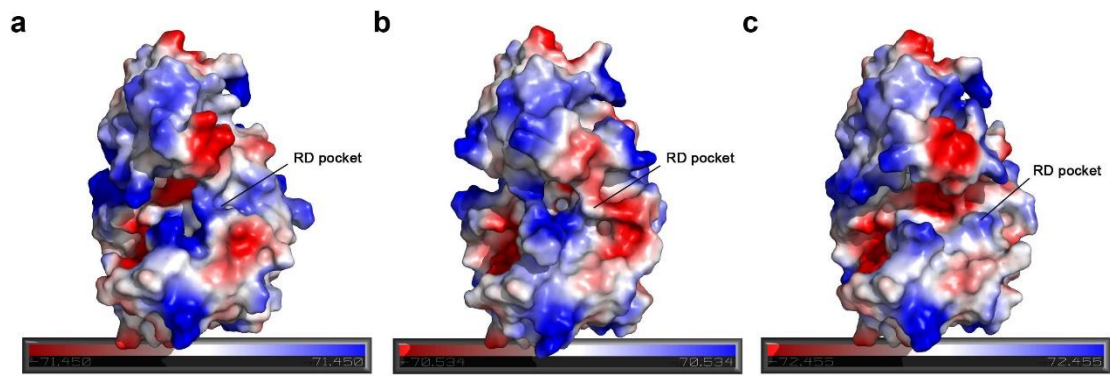

**Fig. S5** HxD-histidine is related to the electric potential energy of the RD pocket. Vacuum electrostatics analyses of WT Aurora A's and its HxD histidine mutants' surface charge show that WT Aurora A possessed high electric potential energy around its RD pocket (*a*). The potential energy is decreased in H254R mutant (*b*), while H254Y mutant do not change the surface charge of the RD pocket (*c*).

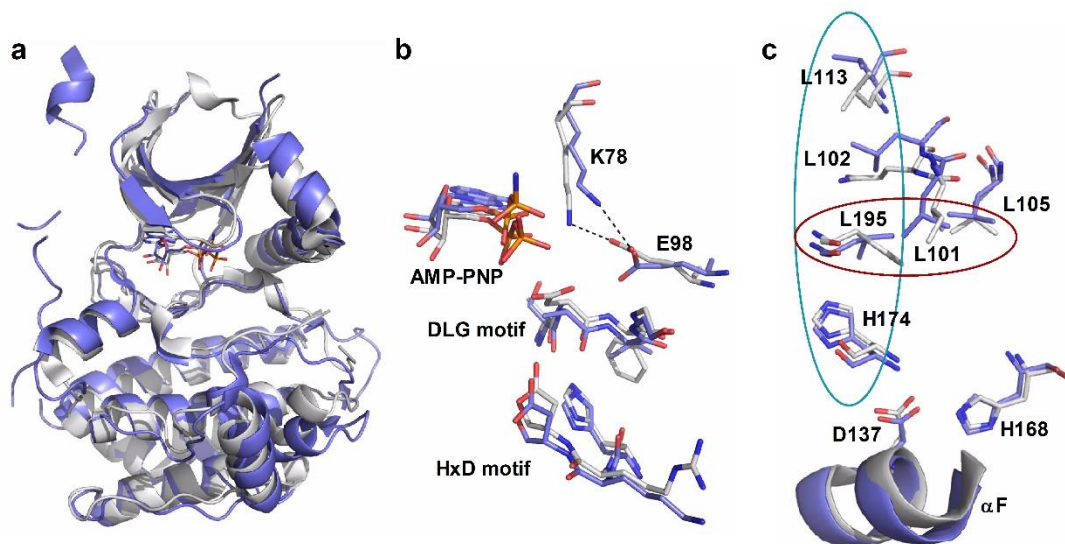

**Fig. S6** Structure comparison of LKB1 and Aurora A. (a) Comparison of overall structures of LKB1 (PDB code: 2WTK) and Aurora A (PDB code: 1MQ4). (b-c) Although the active regulation mechanism of LKB1 is unique, the pattern of the catalytic core, the regulatory spine and the hydrophobic hook at the N-terminus of the activation segment are all conserved in the active conformation of LKB1. The carbons of LKB1 and Aurora A are colored purple and gray, respectively. The regulatory spine and the hydrophobic hook at the N-terminus of the activation segment were shown as blue and red ellipses, respectively. To avoid confusion, only residues of LKB1 are labeled.

**Table S1. High resolution active structures used for alignment.**

| <b>PDB<br/>code</b> | <b>Kinase</b> | <b>Resolution</b> |
|---------------------|---------------|-------------------|
| 3F66                | c-Met         | 1.4               |
| 3A7F                | STK24         | 1.5               |
| 2EU9                | CLK3          | 1.5               |
| 2PVR                | CK2           | 1.6               |
| 1JKL                | DAPK          | 1.6               |
| 2QO7                | Eph3          | 1.6               |
| 1QPC                | Lck           | 1.6               |
| 3IDB                | PKA           | 1.6               |
| 3S95                | LIMK1         | 1.6               |
| 1IA8                | Chk1          | 1.7               |
| 1O6K                | PKB           | 1.7               |
| 3LXL                | Jak3          | 1.7               |
| 1MQ4                | Aurora<br>A   | 1.9               |
| 4WR9                | EGFR          | 1.9               |
| 1IR3                | IRK           | 1.9               |
| 3KF4                | Abl           | 1.9               |
| 2XIK                | YSK1          | 1.9               |
| 3FE3                | MAPK3         | 1.9               |
| 3BRB                | MER           | 1.9               |
| 2J7T                | STK10         | 2.0               |
| 2QLU                | ACTR-IIB      | 2.0               |
| 2HK5                | HCK           | 2.0               |
| 1K3A                | IGF1RK        | 2.1               |
| 1HOW                | SKY1          | 2.1               |
| 2J51                | SLK           | 2.1               |
| 1QMZ                | CDK2          | 2.2               |
| 1DAW                | CK2           | 2.2               |
| 3COK                | PLK           | 2.2               |
| 3COM                | MST1K         | 2.2               |
| 3PLS                | RON           | 2.2               |
| 2VZ6                | CAMK2A        | 2.3               |
| 1CKJ                | CK1           | 2.4               |
| 2ERK                | ERK2          | 2.4               |
| 1O9U                | GSK-3 $\beta$ | 2.4               |
| 1CM8                | P38           | 2.4               |
| 3L8P                | Tie2          | 2.4               |
| 1K9A                | Csk           | 2.5               |
| 2ZV7                | Lyn           | 2.5               |
| 2PHK                | Phk           | 2.6               |
| EGFR                | 1M17          | 2.6               |



|      |       |     |
|------|-------|-----|
| 2ETR | ROCK1 | 2.6 |
| 1H4L | CDK5  | 2.7 |
| 2DQ7 | Fyn   | 2.8 |
| 2VD5 | DMPK  | 2.8 |
